# Supplementary material for: Condensates of synaptic vesicles and synapsin are molecular beacons for actin sequestering and polymerization
Source: PubMed Central journal article supplement — bioRxiv. 2025 Mar 29:2024.07.19.604346. Originally published 2024 Jul 20. Preprint. [Version 2] doi: 10.1101/2024.07.19.604346 (PMC11275919; doi:10.1101/2024.07.19.604346), 2025-03-29
Supplement: NIHPP2024.07.19.604346v1-supplement-1.pdf [file NIHPP2024.07.19.604346v1-supplement-1.pdf]

## Supplementary Figure with Figure Legends

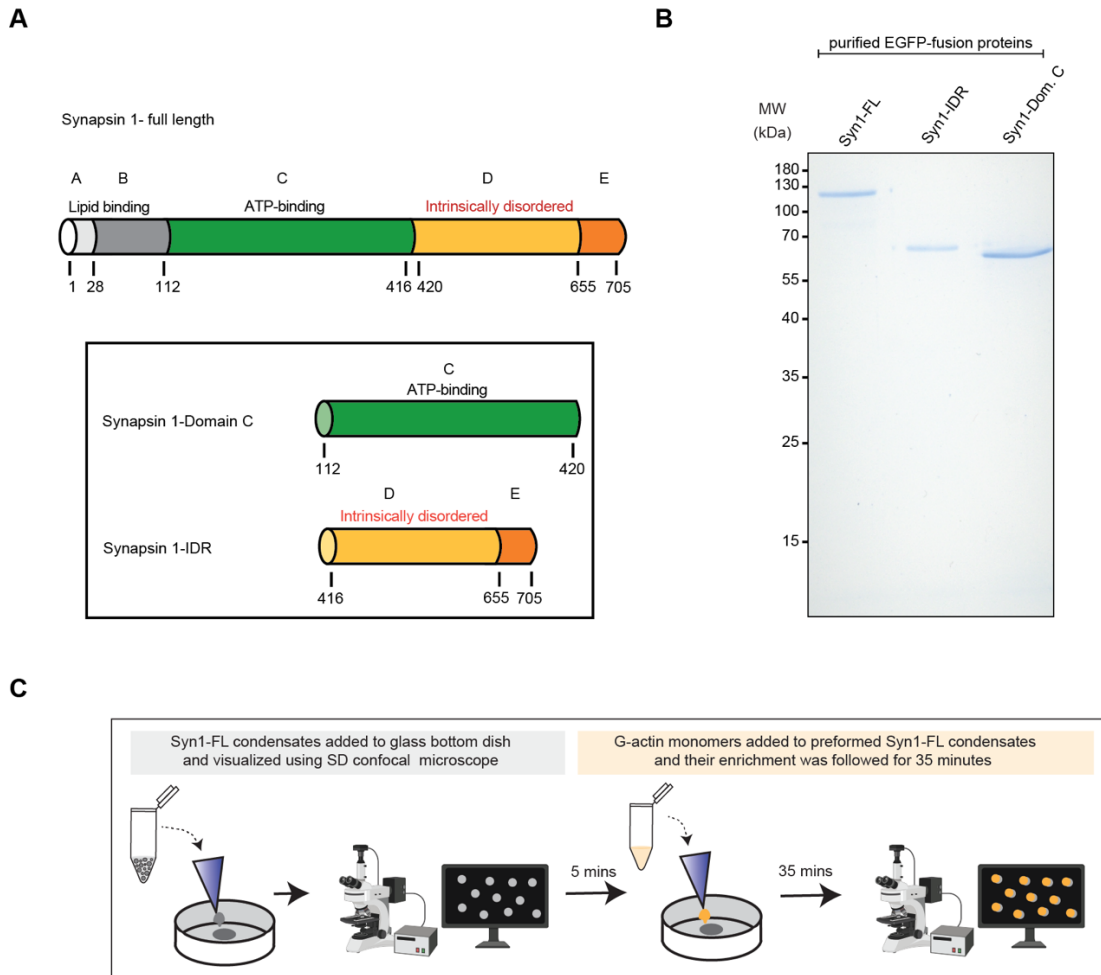

### Supplementary figure 1: Recombinant proteins used for in-vitro reconstitutions.

**A.** Domain organization of Synapsin 1.

**B.** SDS-PAGE gel of the proteins – EGFP-Syn1-FL (102.235 kDa), EGFP-Syn1-IDR (57.621 kDa) and EGFP-Syn1-domain C (63.116 kDa) employed for in-vitro reconstitutions in the present study.

**C.** Schematic illustration of Syn1-actin reconstitution assay. Actin polymerization from Syn1 phases was examined by first forming 6  $\mu\text{M}$  EGFP-Syn1-FL condensates with 3% (w/v) PEG 8000 on a glass bottom dish. After 5 minutes, when EGFP-Syn1-FL condensates became 3-4  $\mu\text{m}$  in size, ATTO647 labelled G-actin monomers were added from top into these pre-formed EGFP-Syn1-FL condensates such that the final concentration of actin and EGFP-Syn1-FL in the final reaction mix was 4 and 4  $\mu\text{M}$  respectively.

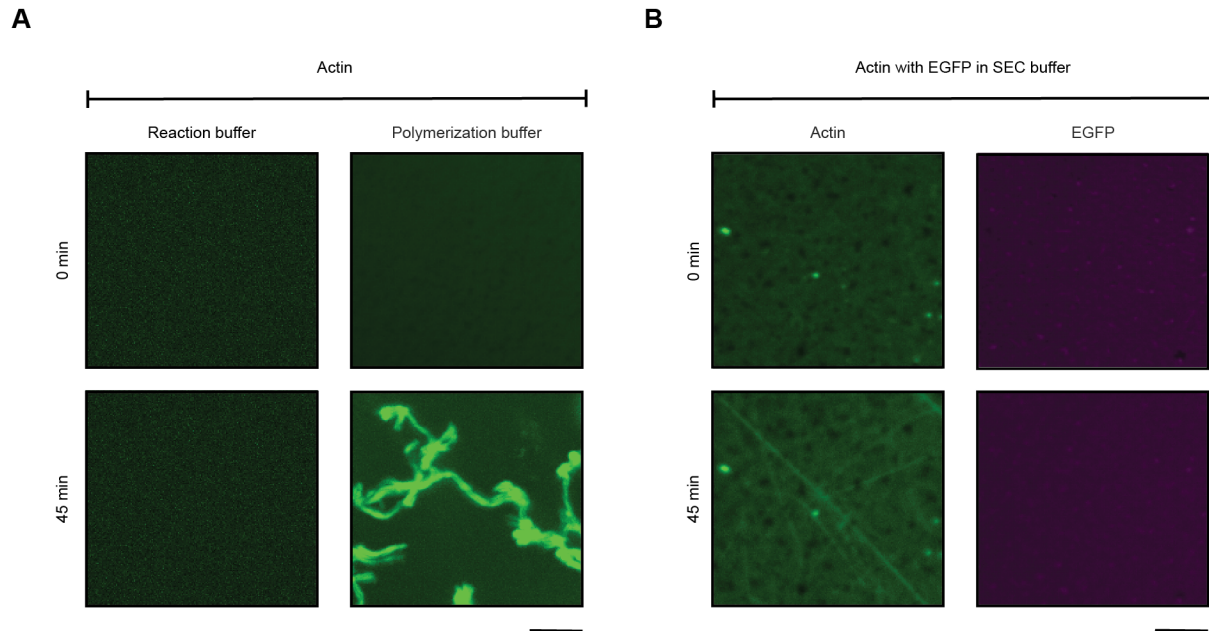

**Supplementary figure 2: Positive and negative controls for actin polymerization.**

**A.** Representative images for actin polymerization in reaction buffer and commercial polymerization buffer (FluMaXx) at  $t = 0$  and  $t = 45$  minutes. Images were acquired using spinning-disk confocal microscope at 488 nm (control for the background signal; represented in magenta) and 647 nm for actin (represented in green). Scale bar, 5  $\mu\text{m}$ .

**B.** Representative images for actin polymerization in presence of EGFP protein, 3% PEG 8K in reaction buffer (buffer used for final elution of the protein from the size-exclusion column, SEC buffer) at  $t = 0$  and  $t = 45$  minutes at 488 nm and 647 nm for EGFP and actin, respectively. Images were acquired using spinning-disk confocal microscope at 488 nm (control for the background signal) and 647 nm for actin. Scale bar, 5  $\mu\text{m}$ .

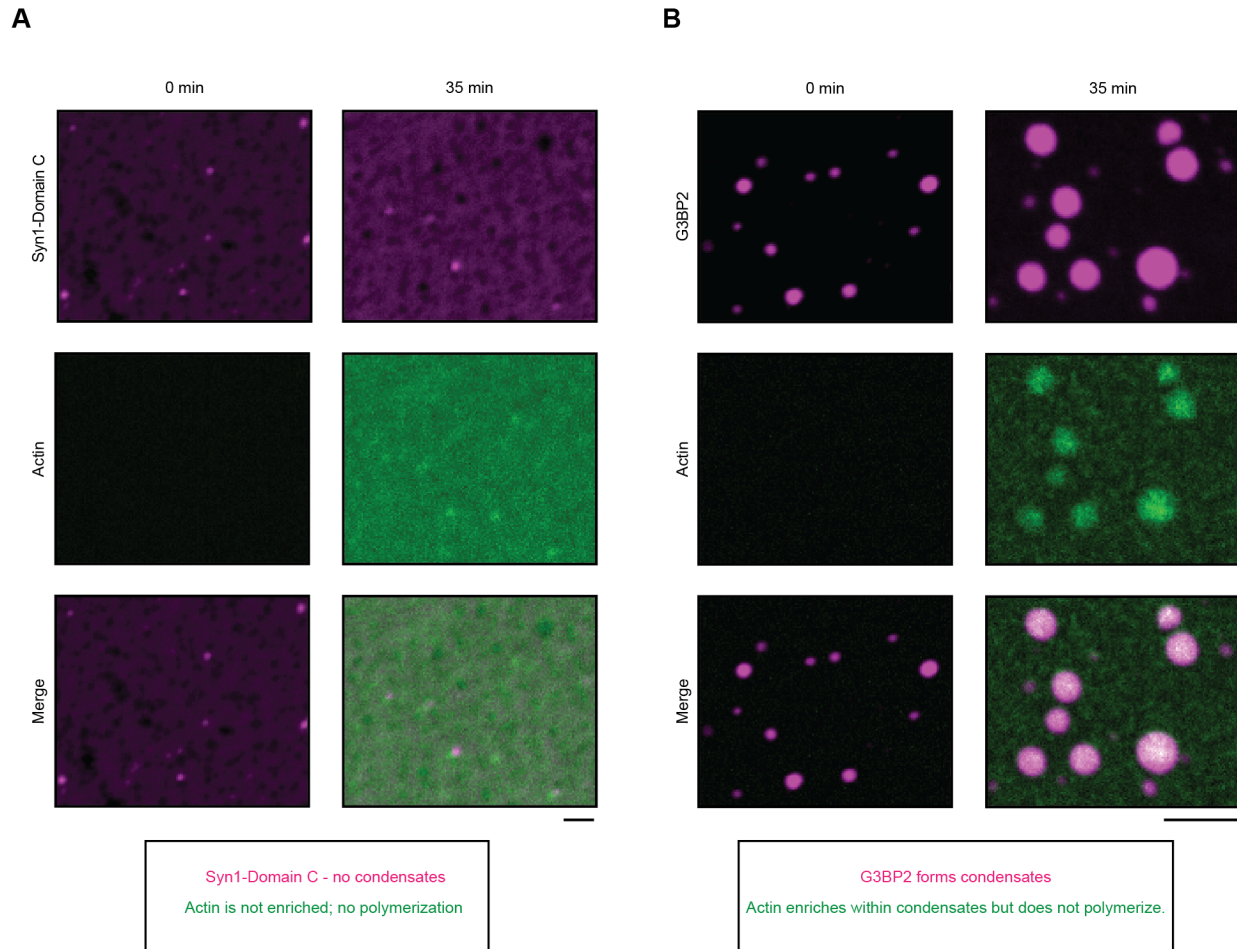

### Supplementary figure 3: In-vitro reconstitution of EGFP-Syn1-Domain C with actin.

**A.** Representative confocal images from the in-vitro reconstitution of EGFP-Syn1-Domain C (4  $\mu\text{M}$ , 3% (w/v) PEG 8000) with ATTO-647 labelled G-actin monomers (4  $\mu\text{M}$ ) at  $t = 0$  (left) and  $t = 35$  minutes (right). Image acquisition for EGFP-Syn1-Domain C and ATTO647 G-actin was carried out at excitation wavelengths 488 nm and 647 nm respectively. Scale bar: 5  $\mu\text{m}$

**B.** Representative confocal images from the in-vitro reconstitution of EGFP-G3BP2 (4  $\mu\text{M}$ , 3% PEG 8,000) with ATTO-647 labeled G-actin monomers (4  $\mu\text{M}$ ) at  $t = 0$  (left) and  $t = 35$  minutes (right). Images were acquired at excitation wavelengths 488 nm and 647 nm for EGFP-G3BP2 and ATTO647 G-actin, respectively. Scale bar: 5  $\mu\text{m}$ .

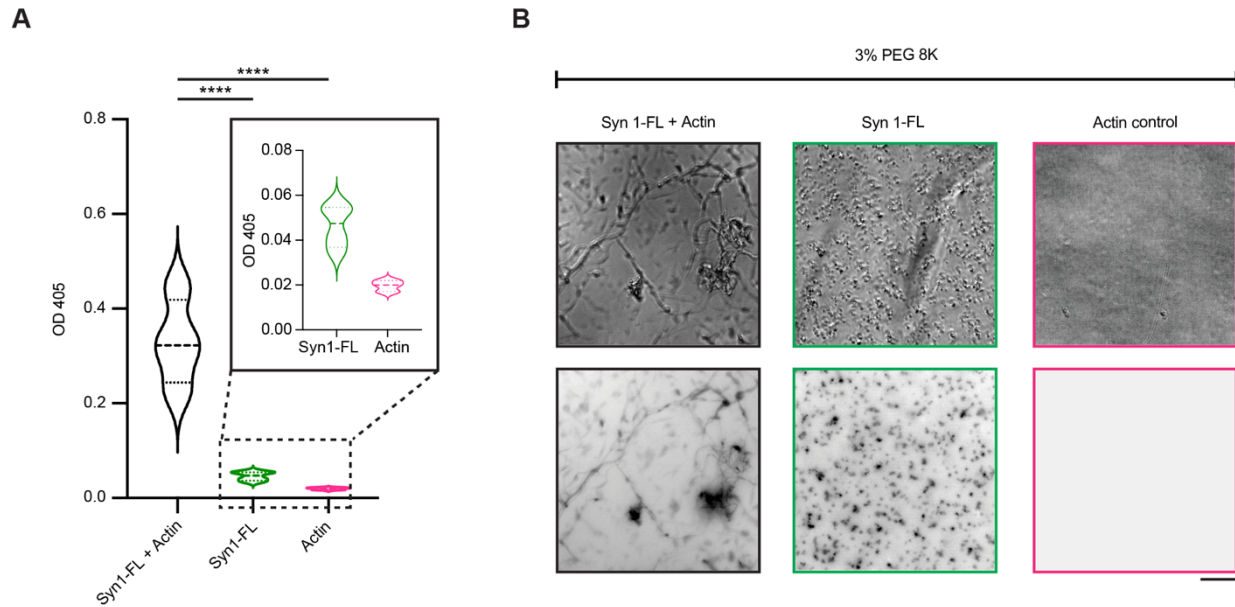

### Supplementary figure 4: Turbidity measurements for in-vitro reconstitutions of synapsin 1 with actin.

**A.** Quantification of the turbidimetry assay. Plot comparing the turbidity measurements for EGFP-Syn1-FL with actin, EGFP-Syn1-FL alone and actin alone in presence of 3% (w/v) PEG 8000. Actin polymerization was assessed as increase in optical density after 48 h of incubation period. Actin used for the assay was  $Mg^{2+}$  exchanged and supplemented with 0.5 mM ATP. Data shown here is quantified from 4 independent experiments (N = 4). \*\*\*\*p<0,0001; one-way ANOVA test.

**B.** Top – representative brightfield images of reaction mixes after turbidimetry assay from a. Bottom – epifluorescence images of the same regions at 488 nm excitation wavelength. Scalebar, 50  $\mu$ m.

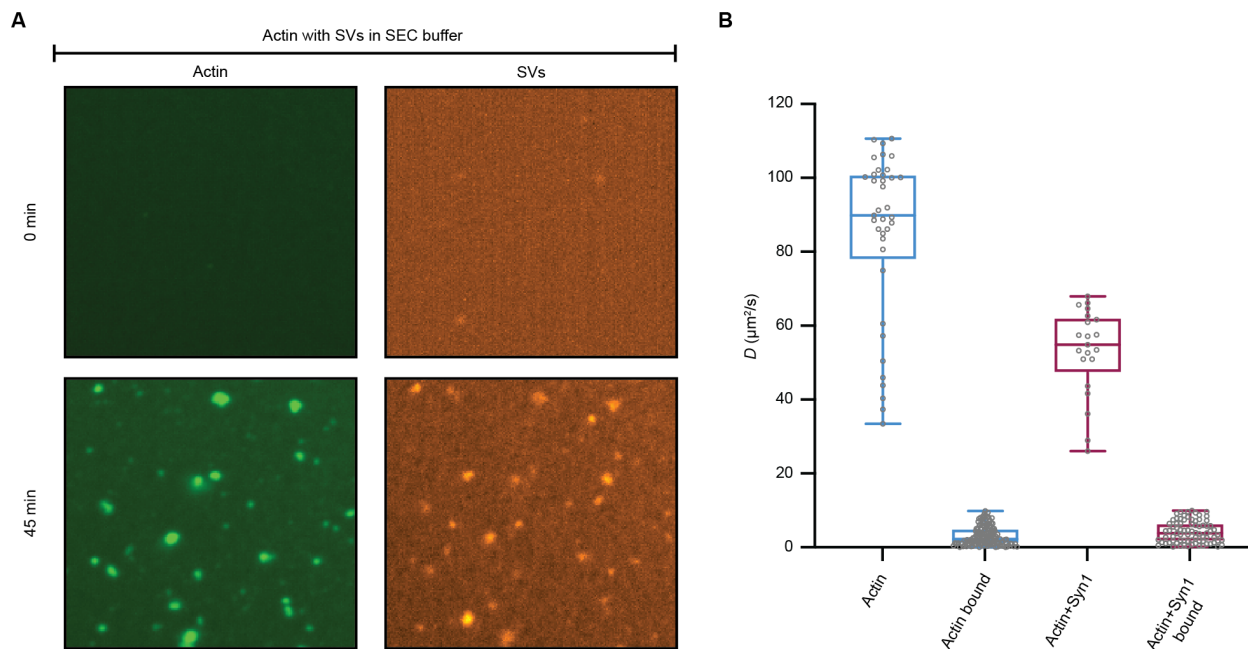

**Supplementary figure 5: Actin reconstitution with native SVs in reaction buffer.**

**A.** Representative images for actin reconstitution in presence of natively purified 3 nM SVs labelled with FM4-64 (1.65  $\mu\text{M}$  final concentration), 3% PEG 8K in reaction buffer at  $t = 0$  and  $t = 45$  minutes. Images were acquired using a spinning-disk confocal microscope at 561 nm and 647 nm for SVs and actin, respectively. Scale bar, 5  $\mu\text{m}$ .

**B.** Diffusion coefficients of actin bound to SVs immobilized on a functional surface as described in Perego et al., 2020. Blue boxes, diffusion of actin alone; magenta boxes, diffusion of actin in the presence of EGFP-Synapsin 1.

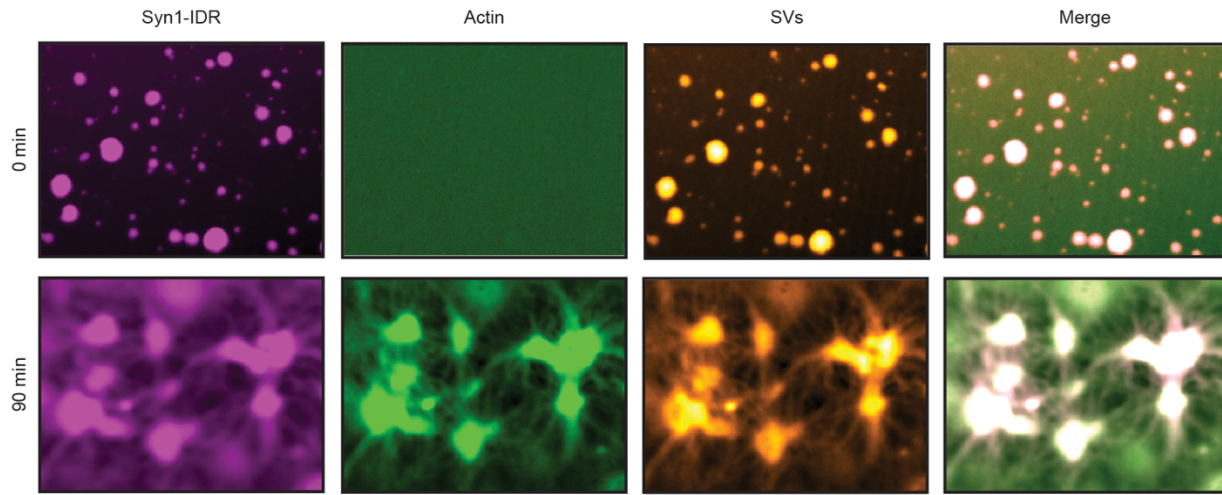

**Supplementary figure 6: Reconstitution of actin with synapsin 1 IDR-SV phases and actin asters.** Representative confocal images of the reconstituted EGFP-Syn1-IDR [4  $\mu$ M, 3% (w/v) PEG 8000] and SVs (3 nM, labelled with FM4-64, 1.65  $\mu$ M) condensates after adding ATTO-647 labelled G-actin monomers (4  $\mu$ M) at  $t = 0$  (top) and 90 minutes (bottom). Excited wavelengths were 488 nm for EGFP-Synapsin 1 IDR, 560 nm for SVs labelled with FM4-64 and 647 for ATTO647 G-actin. Scale bar: 5  $\mu$ m.

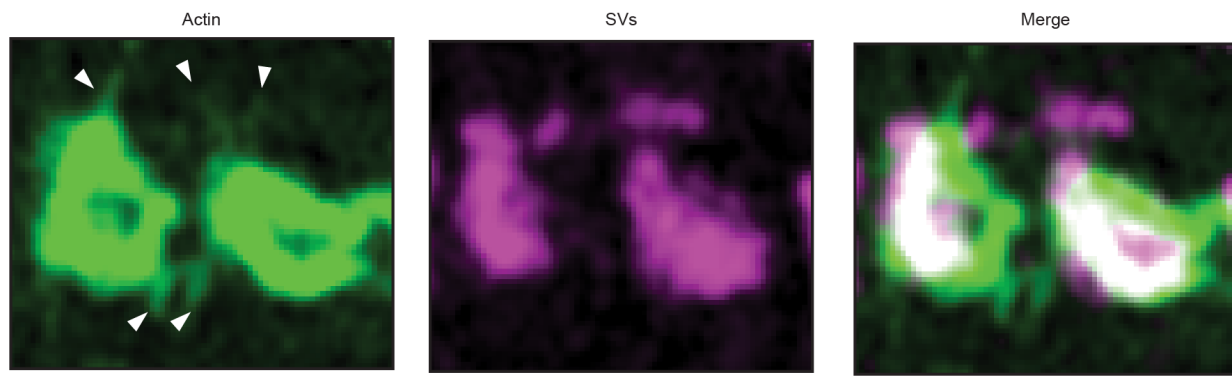

**Supplementary figure 7: Actin-asters visualized in lamprey synapses.** Immuno-fluorescent images showing “actin-asters” at lamprey synapses. Alexa Fluor 488-Phalloidin and SV2 were used here for labelling actin and anti-SV2 antibody, respectively. Images were acquired using a Zeiss CellDiscoverer7 with LSM900 Airyscan2 (plan apochromat 50x/1.2 objective). Scale bar, 1  $\mu$ m.

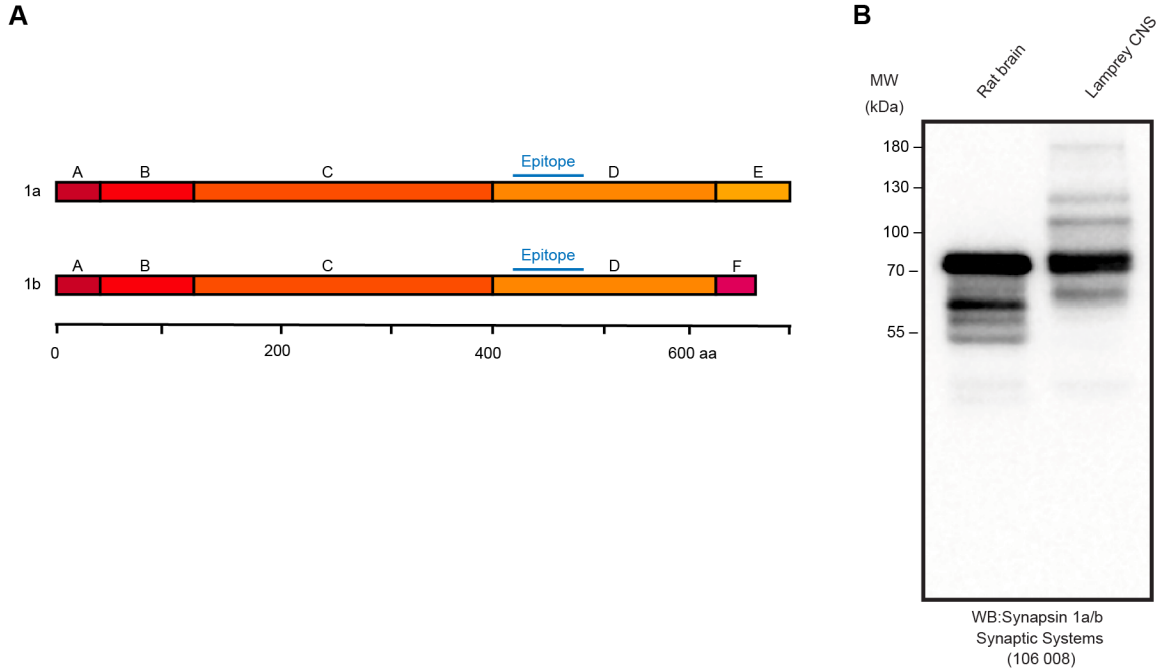

**Supplementary figure 8: Characterization of antibodies against endogenous lamprey synapsin 1.**

**A.** Scheme indicating the region of antibody binding (epitope) within the domains of synapsin 1 isoforms *a* and *b*.

**B.** Western Blot indicating the successful recognition of synapsin 1 in both rat and lamprey CNS lysates (rabbit anti- synapsin 1 a/b antibody; Synaptic Systems 106 008).

**C.**

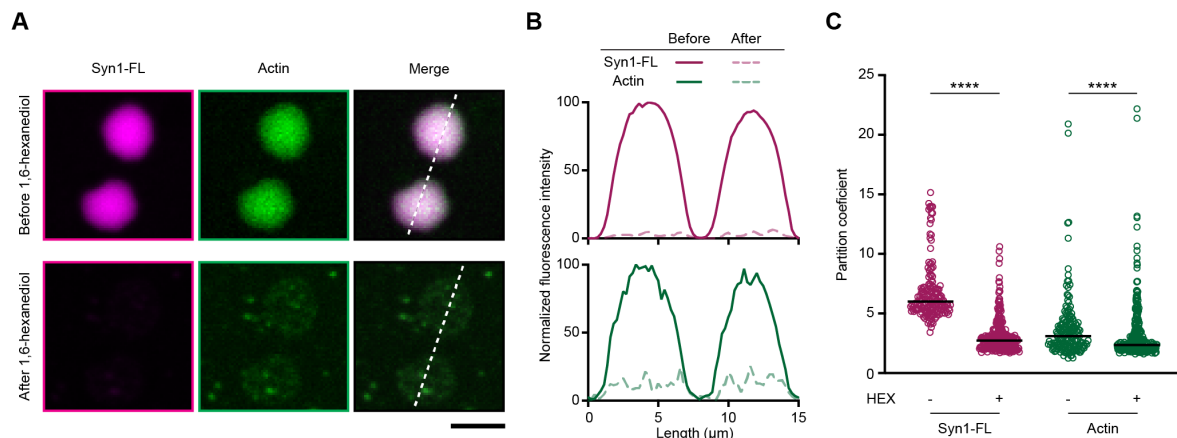

**Supplementary figure 9: 1,6-Hexanediol disperses EGFP-synapsin 1:actin condensates lacking an apparent actin polymerization.**

- A.** Representative confocal images from the in vitro reconstituted EGFP-synapsin 1:actin:GUV assemblies before and after 1,6-hexanediol treatment. Yellow line represents the line used for plotting the intensity profile. Scale bar, 5  $\mu\text{m}$ .
- B.** Fluorescence intensity profiles of EGFP-synapsin 1 and actin along the yellow line from a. Solid lines, fluorescence intensity before and dashed lines, after treatment with 1,6-hexanediol.
- C.** Quantification of synapsin 1 and actin partitioning in EGFP-synapsin 1:actin:GUV assemblies before and after 1,6-hexanediol treatment. Data from three independent reconstitutions, >1500 condensates analyzed for each condition. \*\*\*\*  $p < 0.0001$ ; Mann-Whitney nonparametric test.

**Supplementary Table 1.** Primer sequences for plasmid construction inserted into DNA sequences of 6xHis-EGFP-*Bgl*II...*Sac*I-SV40 expression cassette encoding for human Syn1-Dom.C and Syn1-IDR inserts.

|                                        |                                                                                                        |
|----------------------------------------|--------------------------------------------------------------------------------------------------------|
| <b>#DML0022+0023</b><br><b>(A206K)</b> | <b>FW:</b> CACCCAGTCCA <b>AAG</b> CTGAGCAAAGACCCC<br><b>RV:</b> CTTTGCTCAG <b>CTT</b> GGACTGGGTGCTCAGG |
|----------------------------------------|--------------------------------------------------------------------------------------------------------|
